# Supplementary material
Source: MDPI journal article supplement (https://www.mdpi.com/search?q=ijms-19-01038)
Supplement: s001 [file ijms-19-01038-s001.pdf]

## Supplementary Material

### Genome-Wide Analysis of *DCL*, *AGO*, and *RDR* Gene Families in Pepper (*Capsicum annuum* L.)

Lei Qin, Ning Mo, Tayeb Muhammad, Yan Liang\*

\*Correspondence: [liangyan@nwsuaf.edu.cn](mailto:liangyan@nwsuaf.edu.cn)

Table S1. The sequences of primers used in this study

| Primer number | Primer name | Primer sequence (5' to 3')<br>Sequences underlined are digestion sites |
|---------------|-------------|------------------------------------------------------------------------|
| 1             | CaAGO1aF    | ctctacagaccactgacgcactt                                                |
| 2             | CaAGO1aR    | caaccacgacggaacct                                                      |
| 3             | CaAGO1bF    | gtcttccactgcctttattgagc                                                |
| 4             | CaAGO1bR    | gtactccgacgcatattccac                                                  |
| 5             | CaAGO2F     | gcagggtgtctgtaggctgtg                                                  |
| 6             | CaAGO2R     | gaaagtctagcactggcataggt                                                |
| 7             | CaAGO4aF    | ctcgtgtccccctttacttta                                                  |
| 8             | CaAGO4aR    | cattcgtgtcgtcttcagccta                                                 |
| 9             | CaAGO4bF    | caatcagcagcaactcacc                                                    |
| 10            | CaAGO4bR    | caacagcccaacgctctacct                                                  |
| 11            | CaAGO4dF    | gggattcttaggtctgcttca                                                  |
| 12            | CaAGO4dR    | gtcagccataagatcacgggt                                                  |
| 13            | CaAGO5F     | agggatggccttcagtgcta                                                   |
| 14            | CaAGO5R     | aggaacgtcgggaacaaca                                                    |
| 15            | CaAGO6F     | acctctattgtgctcctgtgc                                                  |
| 16            | CaAGO6R     | tgatgctgcccgttctga                                                     |
| 17            | CaAGO7F     | ccaatgctgtctgtaccga                                                    |
| 18            | CaAGO7R     | tgaagagccgtggtattgaga                                                  |
| 19            | CaAGO10aF   | atattcctggtactgtggtga                                                  |
| 20            | CaAGO10aR   | ttccgtctgctggaagttgt                                                   |
| 21            | CaAGO10bF   | ccaaagaccacgggaacaaga                                                  |
| 22            | CaAGO10bR   | taaccacggtgctgggagga                                                   |
| 23            | CaAGO15F    | gagaccaggaaagctccaagaa                                                 |
| 24            | CaAGO15R    | gtccgcaatctttccaggt                                                    |
| 25            | CaDCL1F     | ggtctatccaacccaatctg                                                   |
| 26            | CaDCL1R     | aactccaccatcaccaccctc                                                  |
| 27            | CaDCL2F     | ttgtttgattgagatgggtgc                                                  |
| 28            | CaDCL2R     | agaaggttaagtgagccgagaa                                                 |
| 29            | CaDCL2F-1   | atcgattgagtccttggtatg                                                  |
| 30            | CaDCL2R-1   | ctgtatcgtggcagcgtatttc                                                 |
| 31            | CaDCL3F     | taaagtggaatgaggaagaaca                                                 |
| 32            | CaDCL3R     | tgatgaacaagatgaacagtggg                                                |
| 33            | CaDCL4F     | caatcattgaaccaaccact                                                   |
| 34            | CaDCL4R     | cgcacatctgtcccgcta                                                     |
| 35            | CaRDR1F     | ttatttggctcctcgggtcta                                                  |

|    |             |                          |
|----|-------------|--------------------------|
| 36 | CaRDR1R     | ttcggagaagcaaaggtgaaac   |
| 37 | CaRDR2F     | aggtggcattagagcacaagg    |
| 38 | CaRDR2R     | atgggtgtcactgtttgaggag   |
| 39 | CaRDR3aF    | taccaagtaaagtgaacccaa    |
| 40 | CaRDR3aR    | tagtctctacggaacatgtaat   |
| 41 | CaRDR3bF    | ggaggaggttgattgatag      |
| 42 | CaRDR3bR    | ggtgtcaatagaacagcgga     |
| 43 | CaRDR5F     | ttacataggaggaggaagtgg    |
| 44 | CaRDR5R     | aatcaagatactgcacccgttt   |
| 45 | CaRDR6F     | gtgacctgtacgggtaccttac   |
| 46 | CaRDR6R     | taactggacgaccaactgttta   |
| 47 | CaUBI3F     | tgtccatctgctctctgttg     |
| 48 | CaUBI3R     | cacccaagcacaataagac      |
| 49 | CaDEF1F     | gcagagccatcgttcaagg      |
| 50 | CaDEF1R     | gcacaattcgtctcactagcat   |
| 51 | CaEREBP-C1F | gaagagtcgggtctggttaggtac |
| 52 | CaEREBP-C1R | gaagttggtcttagccttgggt   |
| 53 | CaPR1F      | caggatgcaacactctggtggc   |
| 54 | CaPR1R      | ccgaaccctagcacaaccaaga   |

**Supplementary Table 2**

Table S2. The sequence information of the proteins used for phylogenetic tree construction

| Gene Name | Accession Number | Gene Name | Accession Number   |
|-----------|------------------|-----------|--------------------|
| AtAGO1    | NP_849784.1      | AtDCL4    | OAO90122.1         |
| AtAGO2    | OAP12962.1       | NtDCL1    | XP_016481139.1     |
| AtAGO3    | OAP18010.1       | NtDCL2    | XP_016481987.1     |
| AtAGO4    | Q9ZVD5.2         | NtDCL3    | XP_016512459.1     |
| AtAGO5    | OAP08078.1       | NtDCL4    | XP_016484183.1     |
| AtAGO6    | OAP07893.1       | SlDCL1    | NP_001289827.1     |
| AtAGO7    | Q9C793.1         | SlDCL2a   | NP_001316339.1     |
| AtAGO8    | Q3E984.1         | SlDCL2b   | NP_001316341.1     |
| AtAGO9    | OAO96317.1       | SlDCL2c   | NP_001316342.1     |
| AtAGO10   | Q9XGW1.1         | SlDCL2d   | NP_001316343.1     |
| NtAGO1    | XP_016446232.1   | SlDCL3    | NP_001289826.1     |
| NtAGO2    | XP_016474566.1   | SlDCL4    | AMS34009.1         |
| NtAGO4    | XP_016474566.1   | StDCL1    | XP_006352611.1     |
| NtAGO5    | XP_016507190.1   | StDCL2    | XP_015166742.1     |
| NtAGO7    | XP_016461208.1   | StDCL3    | XP_006361520.1     |
| NtAGO10   | XP_016459326.1   | StDCL4    | XP_006343690.1     |
| NbAGO1    | ABC61502.1       | AtRDR1    | NP_172932.1        |
| NbAGO4    | ABC61505.1       | AtRDR2    | NP_192851          |
| SlAGO1a   | NP_001266057.1   | AtRDR3    | NP_179581.2        |
| SlAGO1b   | NP_001266261.2   | AtRDR4    | NP_179583.3        |
| SlAGO2    | NP_001266235.2   | AtRDR5    | NP_179582.2        |
| SlAGO3    | NP_001274720.1   | AtRDR6    | NP_190519.1        |
| SlAGO4a   | NP_001266156.1   | SIRDR1    | NP_001234319.1     |
| SlAGO4b   | NP_001289847.1   | SIRDR2    | XP_004236120.1     |
| SlAGO4d   | NP_001266010.1   | SIRDR3    | XP_010322170.1     |
| SlAGO5    | NP_001265878.1   | SIRDR5    | XP_010313737.1     |
| SlAGO6    | NP_001266273.1   | SIRDR6    | NP_001266205.1     |
| SlAGO7    | NP_001266209.1   | NtRDR1    | CAA09697.1         |
| SlAGO10   | NP_001289838.1   | NtRDR2    | XP_016448058.1     |
| StAGO1    | XP_006364394.1   | NtRDR3    | XP_016511895.1     |
| StAGO2    | XP_006353071.1   | NtRDR5    | XP_016449580.1     |
| StAGO4    | XP_006362741.1   | NtRDR6    | ADI52625.1         |
| StAGO5    | XP_006347212.1   | StRDR1    | ABO92977.1         |
| StAGO7    | XP_006365299.1   | StRDR2    | XP_006345040.1     |
| StAGO10   | XP_006363457.1   | StRDR3    | XP_006338861.1     |
| AtDCL1    | NP_171612.1      | StRDR5    | XP_006353487.1     |
| AtDCL2    | NP_566199.4      | StRDR6    | XP_006346784.1     |
| AtDCL3    | OAP05809.1       | SlAGO15   | Solyc03g111760.2.1 |

## Supplementary Figure 2

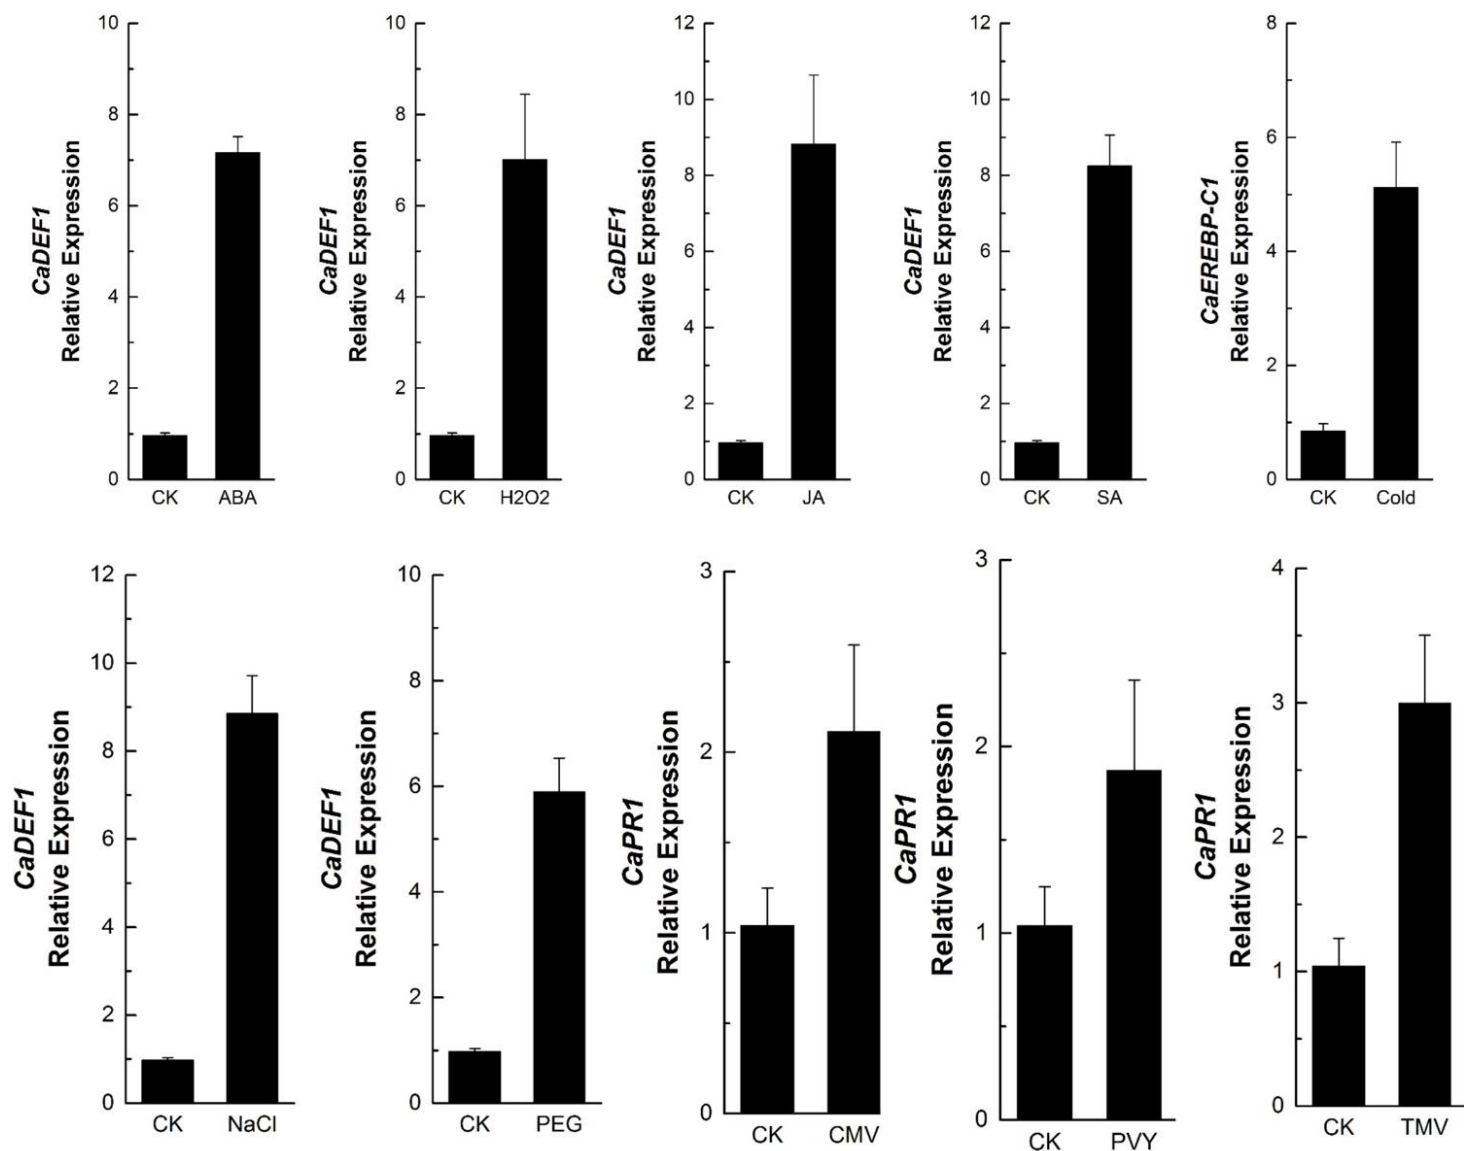

Figure S1. Expression level of stress-related genes. The pepper *Ubi3* was used as the reference gene, and three biological replicates were performed for these experiments. Error bars indicate the standard errors.

## Supplementary Figure 2

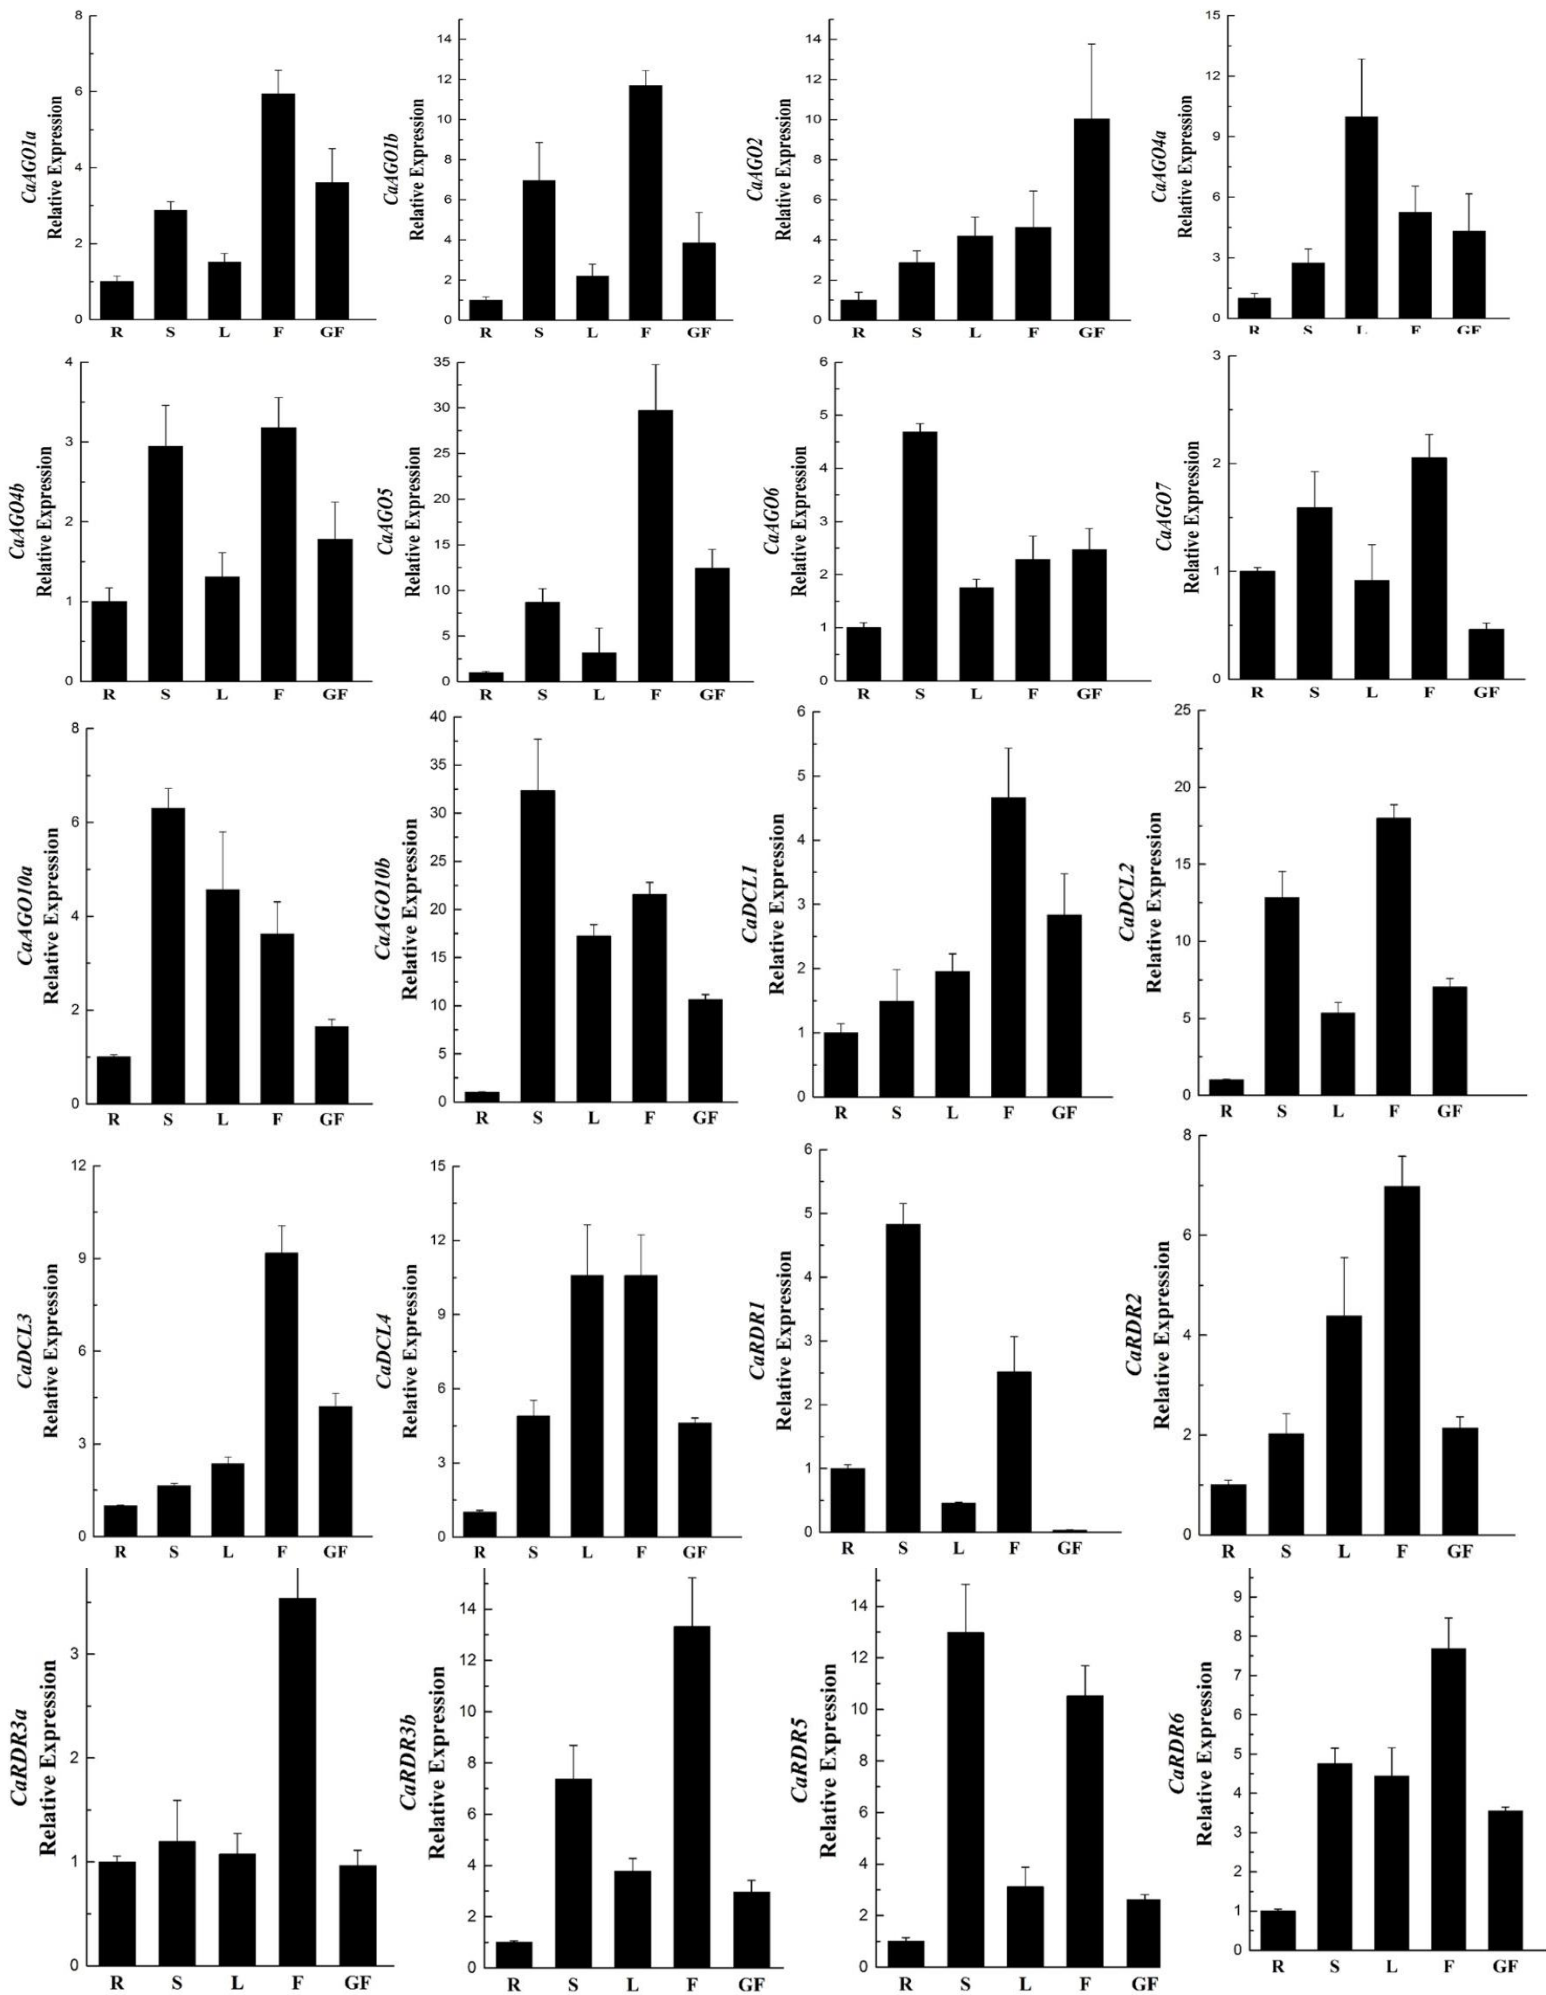

Figure S2. Relative expression level of *CaAGOs*, *CaDCLs* and *CaRDRs* genes in various organs. The pepper *Ubi3* was used as the reference gene, and three biological replicates were performed for these experiments. Error bars indicate the standard errors.

**Supplementary Figure 3**

**(A)**

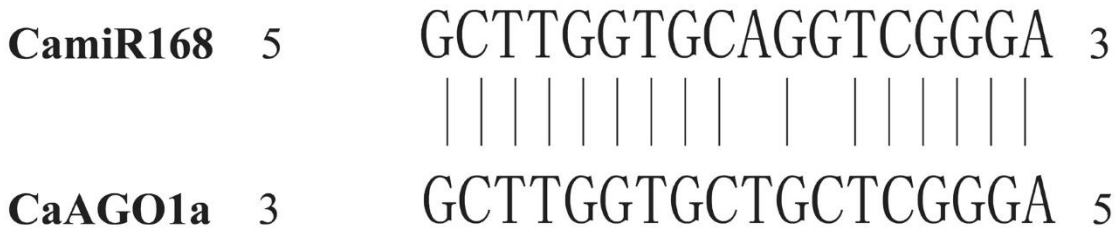

**(B)**

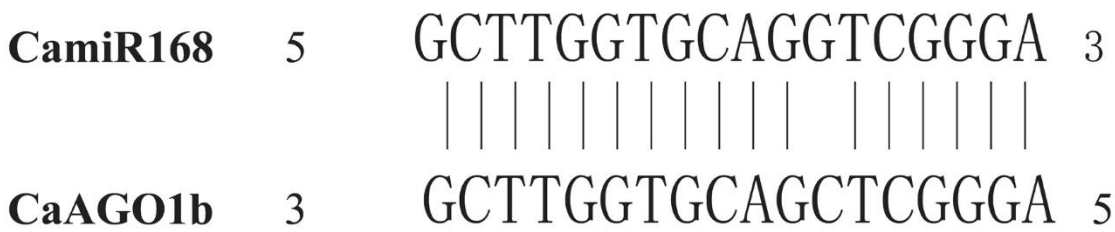

**(C)**

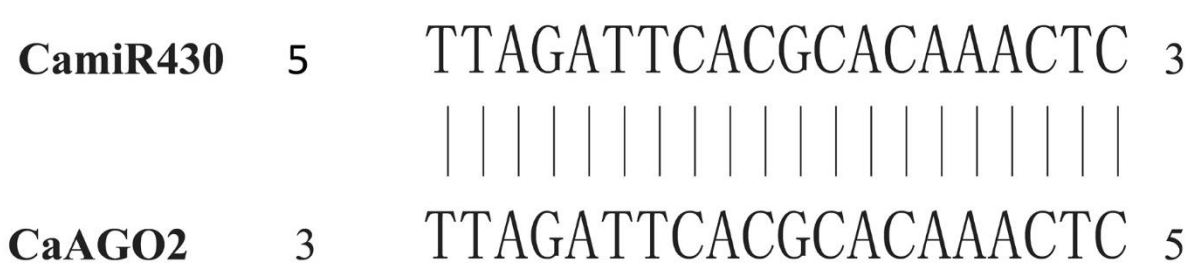

Figure S3 Identificatin the target site of *CaAGO1a/b* (A, B) and *CaAGO2*(C) to miR168 and miR403, respectively.
